# Supplementary material
Source: Springer Nature journal article supplement (https://www.springermedizin.de/resource/supplementary/12876_2009_453_MOESM1_ESM.pdf/9437042)
Supplement: MOESM1 [file 9437042]

Kawempe Division,  
22% of Kampala's population

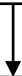

Mulago II Parish,  
1 of 22 parishes at Kawempe

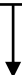

472 children age 0<12 years  
consecutively approached

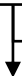

451 available children

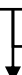

427 apparently healthy children  
age 0<12 years

31 declined participation

14 children excluded:

- medical conditions (3)
- positive HIV test (5)
- failed to provide stools (5)
- incomplete data (1)
